# Supplementary material for: Computational Estimates of Membrane Flow and Tension Gradient in Motile Cells
Source: PubMed Central journal article supplement (PMC3894945; doi:10.1371/journal.pone.0084524), 2014-01-17

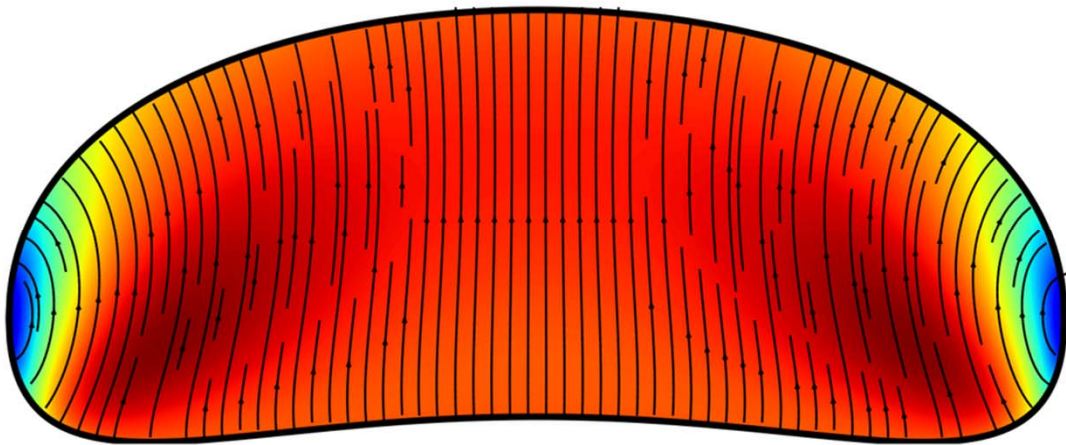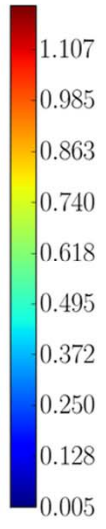

Supplement: pone.0084524.s001.pdf [file pone.0084524.s001.pdf]
